# Supplementary material for: Peroxiredoxin1, a novel regulator of pronephros development, influences retinoic acid and Wnt signaling by controlling ROS levels
Source: PubMed Central journal article supplement (PMC5567039; doi:10.1038/s41598-017-09262-6), 2017-08-21
Supplement: 41598_2017_9262_MOESM1_ESM.pdf [file 41598_2017_9262_MOESM1_ESM.pdf]

# **Peroxiredoxin1, a novel regulator of pronephros development, influences retinoic acid and Wnt signaling by controlling ROS levels**

Soomin Chae<sup>1†</sup>, Hyun-Kyung Lee<sup>1†</sup>, Yoo-Kyung Kim<sup>1†</sup>, Hyo Jung Sim<sup>2</sup>, Yoorim Ji<sup>1</sup>, Chowon Kim<sup>1</sup>, Tayaba Ismail<sup>1</sup>, Jeen-Woo Park<sup>1</sup>, Oh-Shin Kwon<sup>1</sup>, Beom-Sik Kang<sup>1</sup>, Dong-Seok Lee<sup>1</sup>, Jong-Sup Bae<sup>3</sup>, Sang-Hyun Kim<sup>4</sup>, Kyoung-Jin Min<sup>5</sup>, Taeg Kyu Kwon<sup>5</sup>, Mae-Ja Park<sup>6</sup>, Jin-Kwan Han<sup>7</sup>, Taejoon Kwon<sup>2</sup>, Tae-Joo Park<sup>2\*</sup>, and Hyun-Shik Lee<sup>1\*</sup>

<sup>1</sup>KNU-Center for Nonlinear Dynamics, School of Life Sciences, BK21 Plus KNU Creative BioResearch Group, College of Natural Sciences, Kyungpook National University, Daegu 41566, South Korea

<sup>2</sup>School of Life Sciences, Ulsan National Institute of Science and Technology (UNIST), Ulsan 44919, South Korea

<sup>3</sup>College of Pharmacy, Research Institute of Pharmaceutical Sciences, Kyungpook National University, Daegu 41566, South Korea

<sup>4</sup>Department of Pharmacology, College of Medicine, Kyungpook National University, Daegu 41944, South Korea

<sup>5</sup>Department of Immunology, School of Medicine, Keimyung University, Daegu 42601, South Korea

<sup>6</sup>Department of Anatomy, College of Medicine, Kyungpook National University, Daegu 41944, South Korea

<sup>7</sup>Department of Life Sciences, Pohang University of Science and Technology, Pohang, Kyungbuk 37673, South Korea

†These authors contributed equally to this work.

\*Address correspondence to:

**H-S Lee, Ph.D.** Tel: 82-53-950-7367, Fax: 82-53-943-2762, E-mail: leeh@knu.ac.kr

**T-J Park, Ph.D.** Tel: 82-52-217-2582, Fax: 82-52-217-5309, E-mail: parktj@unist.ac.kr

Running Title: Peroxiredoxin1 regulates pronephros development

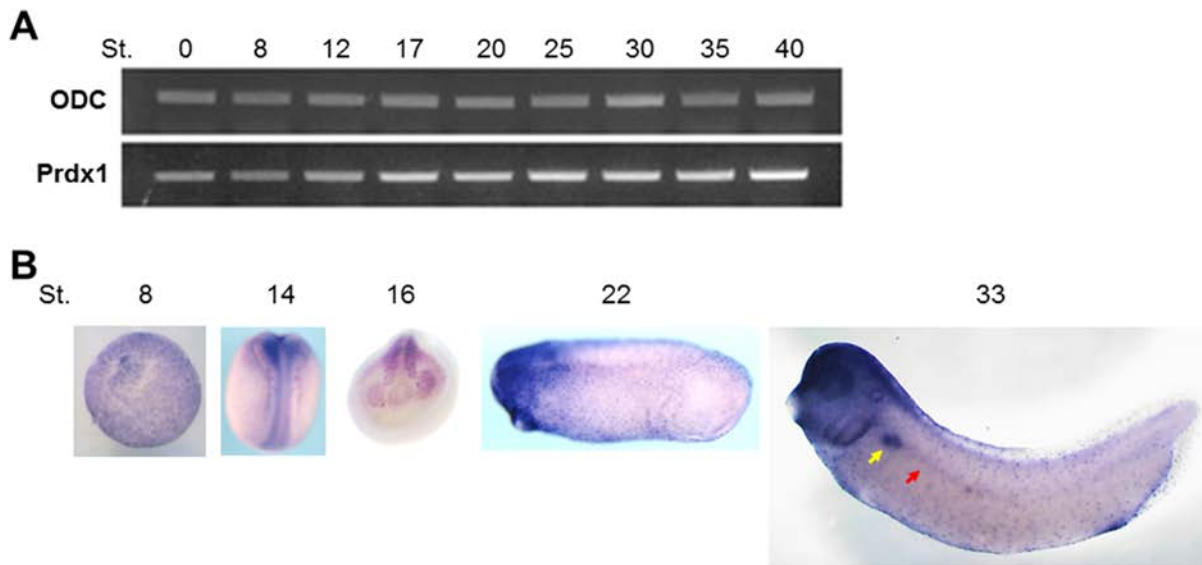

**Figure S1. Spatiotemporal expression pattern of Prdx1 during embryogenesis.**

- A.** *Xenopus* embryos were harvested at various stages and RT-PCR was performed using standard methods. The Numbers indicate the embryonic stages. *odc* was used as the loading control. The expression of *prdx1*, a maternal gene, gradually increased from the blastula to the tadpole stage.
- B.** Whole mount *in situ* hybridization with a digoxigenin labeled antisense probe against *prdx1* was performed for embryos at stage 8, 14, 16, 22 and 33. *prdx1* was expressed in the forebrain, eye, multiciliated cells, and pronephros. The yellow arrow points to the developing pronephros; the red arrow points to the presumptive pronephric tubule ducts.

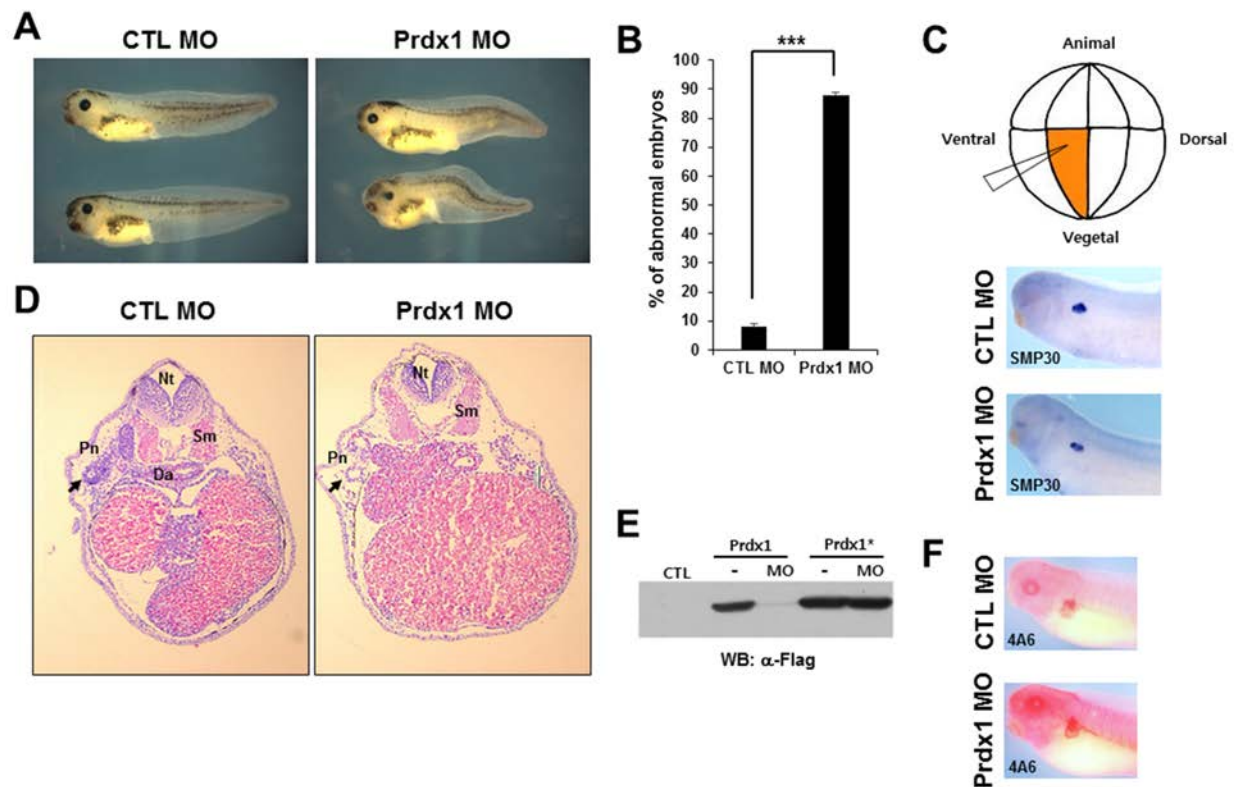

**Figure S2. Injection of the *prdx1* MOs results in phenotypic abnormalities.**

- A.** *prdx1* MOs were injected into both blastomeres of two-cell stage embryos. There were phenotypic abnormalities in *prdx1* MO-injected embryos compared with control MO-injected embryos.
- B.** Severity of the phenotypic abnormalities in *prdx1* MO-injected embryos compared with control MO-injected embryos.
- C.** *prdx1* MO was injected into a V.2.2 blastomere of 16-cell stage embryos. Embryos at the stage 33 were used for whole-mount *in situ* hybridization, and proximal tubules in the pronephros were visualized with a *smp30* probe. Embryos exhibited similar developmental abnormalities as were observed for *prdx1* MO injections at two-cell stage.

- D.** *prdx1* MOs (40 ng) were injected into both blastomeres of two-cell stage embryos. Embryos at the stage 33 were transversely sectioned, and serial sections were stained with hematoxylin and eosin. The *prdx1* MO-injected embryos displayed malformed or undifferentiated internal organs that appeared to be scattered. Nt, neural tube; Sm, somites; Pn, pronephros; Da, dorsal aorta.
- E.** Specificity of *prdx1* MO was confirmed by western blot analysis using Flag antibody. The translation product for WT *prdx1* RNA was markedly reduced by *prdx1* MO.
- F.** 4A6 staining of intermediate, distal and connecting tubules was performed at stage 40 in *prdx1* morphants. *prdx1* knockdown did not affected formation of intermediate, distal and connecting tubules.

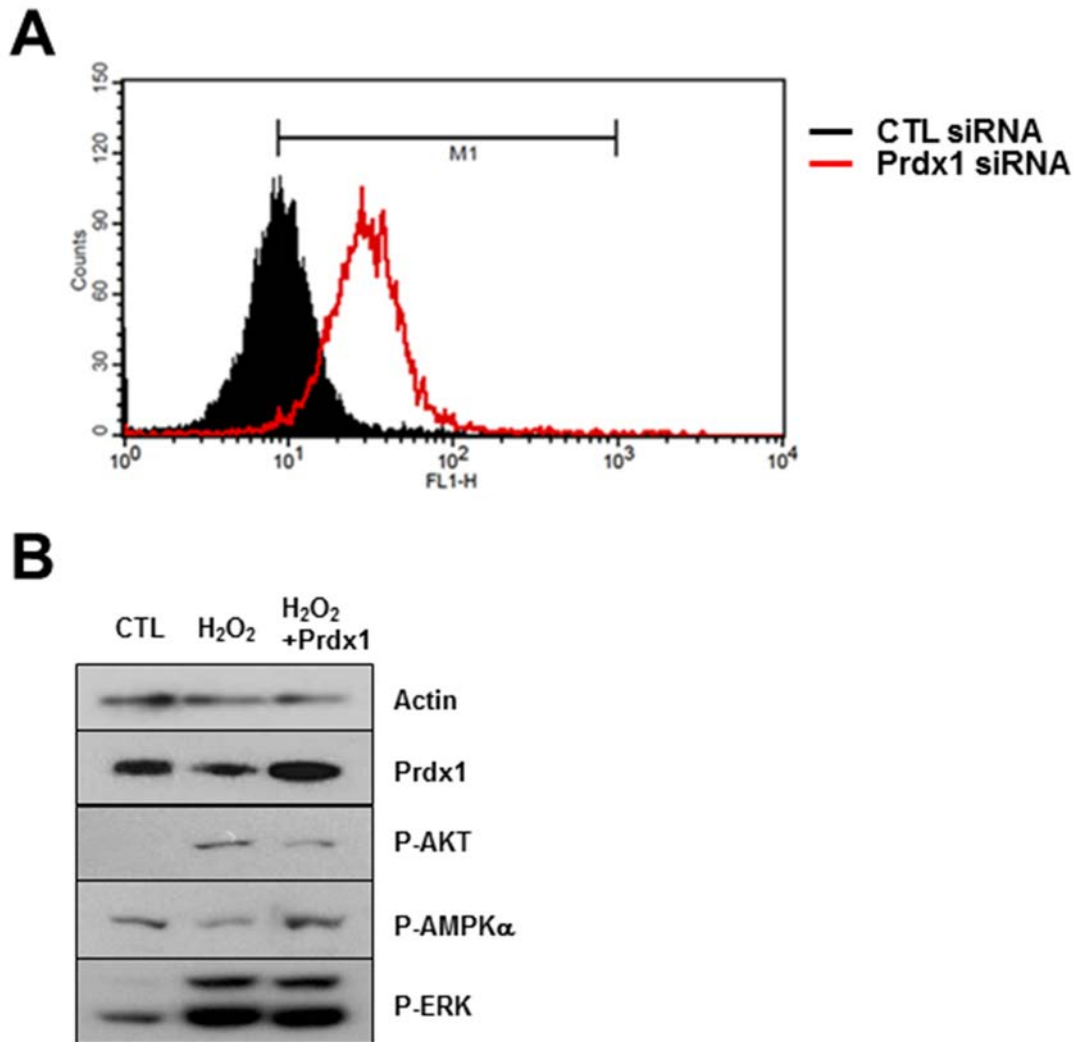

**Figure S3. Transfection with Prdx1 siRNAs increased the ROS levels in MDCK cells.**

- A. Endogenous ROS levels in MDCK cells transfected with either 10 nM *prdx1* or control siRNAs were measured using flow cytometry. The cellular ROS level was higher in *prdx1* siRNA-transfected cells than in control siRNA-transfected cells.
- B. MDCK cells were co-treated with H<sub>2</sub>O<sub>2</sub> and H<sub>2</sub>O<sub>2</sub> + *prdx1* and observed their effects on ROS products. Treatment of H<sub>2</sub>O<sub>2</sub> enhanced the phosphorylation of AKT (P-AKT) while phosphorylation of AMPK $\alpha$  (P-AMPK $\alpha$ ) was reduced. Prdx1 transfection reversed the expression *i.e.* downregulated the expression of P-AKT and upregulated the P-AMPK $\alpha$

expression. Induced P-ERK by H<sub>2</sub>O<sub>2</sub> was not affected by expression of *prdx1* in transfected MDCK cells.

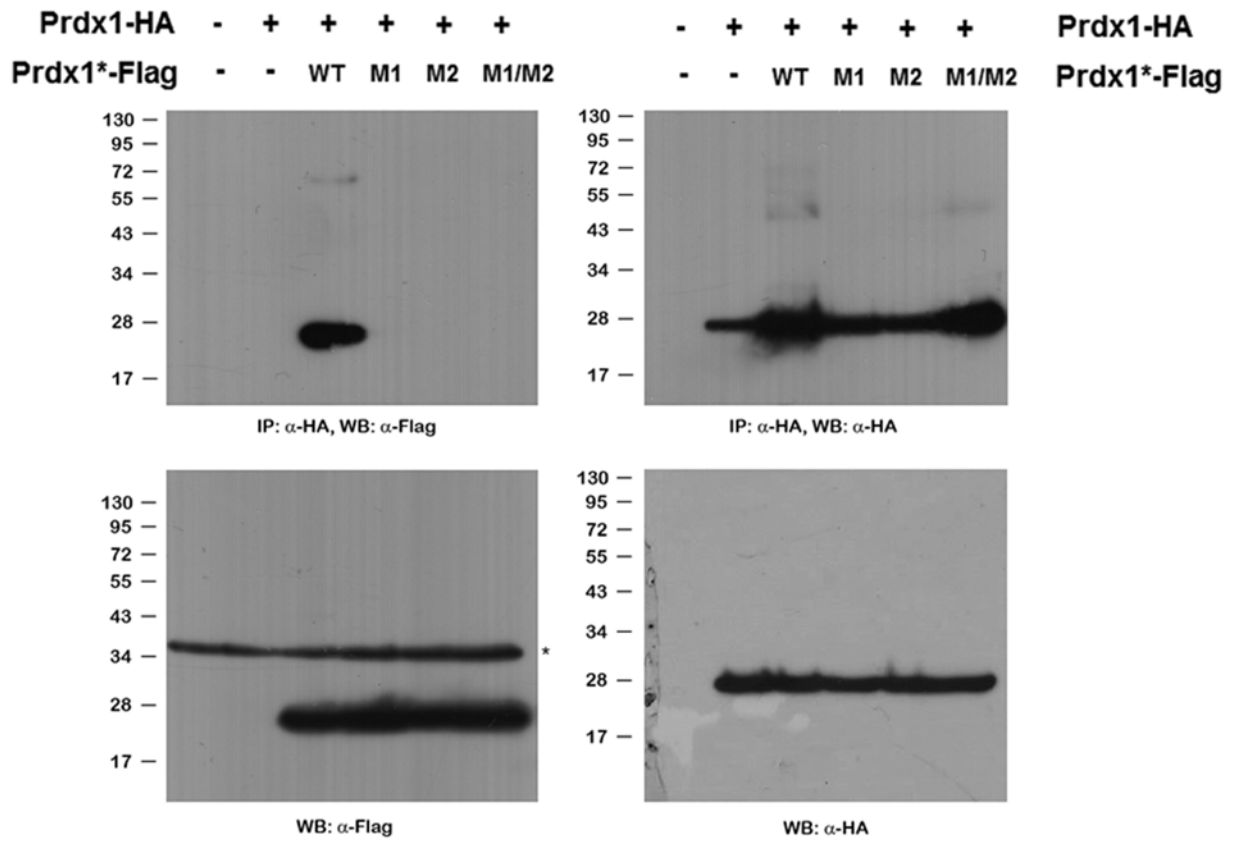

**Figure S4. Selected representative full gel scans.**

Full gel scans of figures 2B. Asterisk indicates non-specific band.
